# Supplementary material for: In vitro and in vivo effects of miRNA-19b/20a/92a on gastric cancer stem cells and the related mechanism
Source: PubMed Central journal article supplement — Int J Med Sci. 2018 Jan 1;15(1):86–94. doi: 10.7150/ijms.21164 (PMC5765743; doi:10.7150/ijms.21164), 2018-01-01
Supplement: ijmsv15p0086s1.pdf [file ijmsv15p0086s1.pdf]

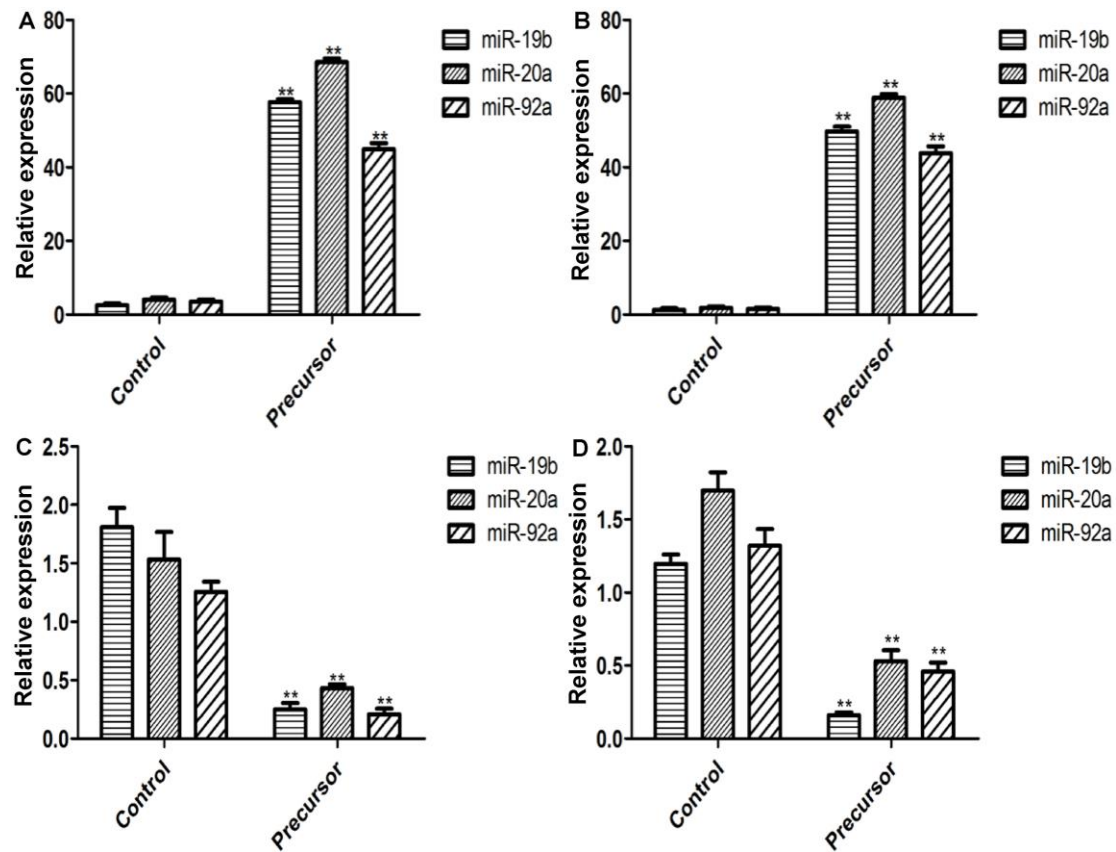

**Figure S1.** Transient transfection expressions. miRNA expressions in (A) CD44<sup>-</sup>/EpCAM<sup>-</sup> and (B) MKN28 cells after transfection with pre-miRNA-19b/20a/92a; miRNA expressions in (C) CD44<sup>+</sup>/EpCAM<sup>+</sup> and (D) SGC7901 cells after transfection with pre-miRNA-19b/20a/92a antagonists. Compared with control group, \*P<0.05, \*\*P<0.01.

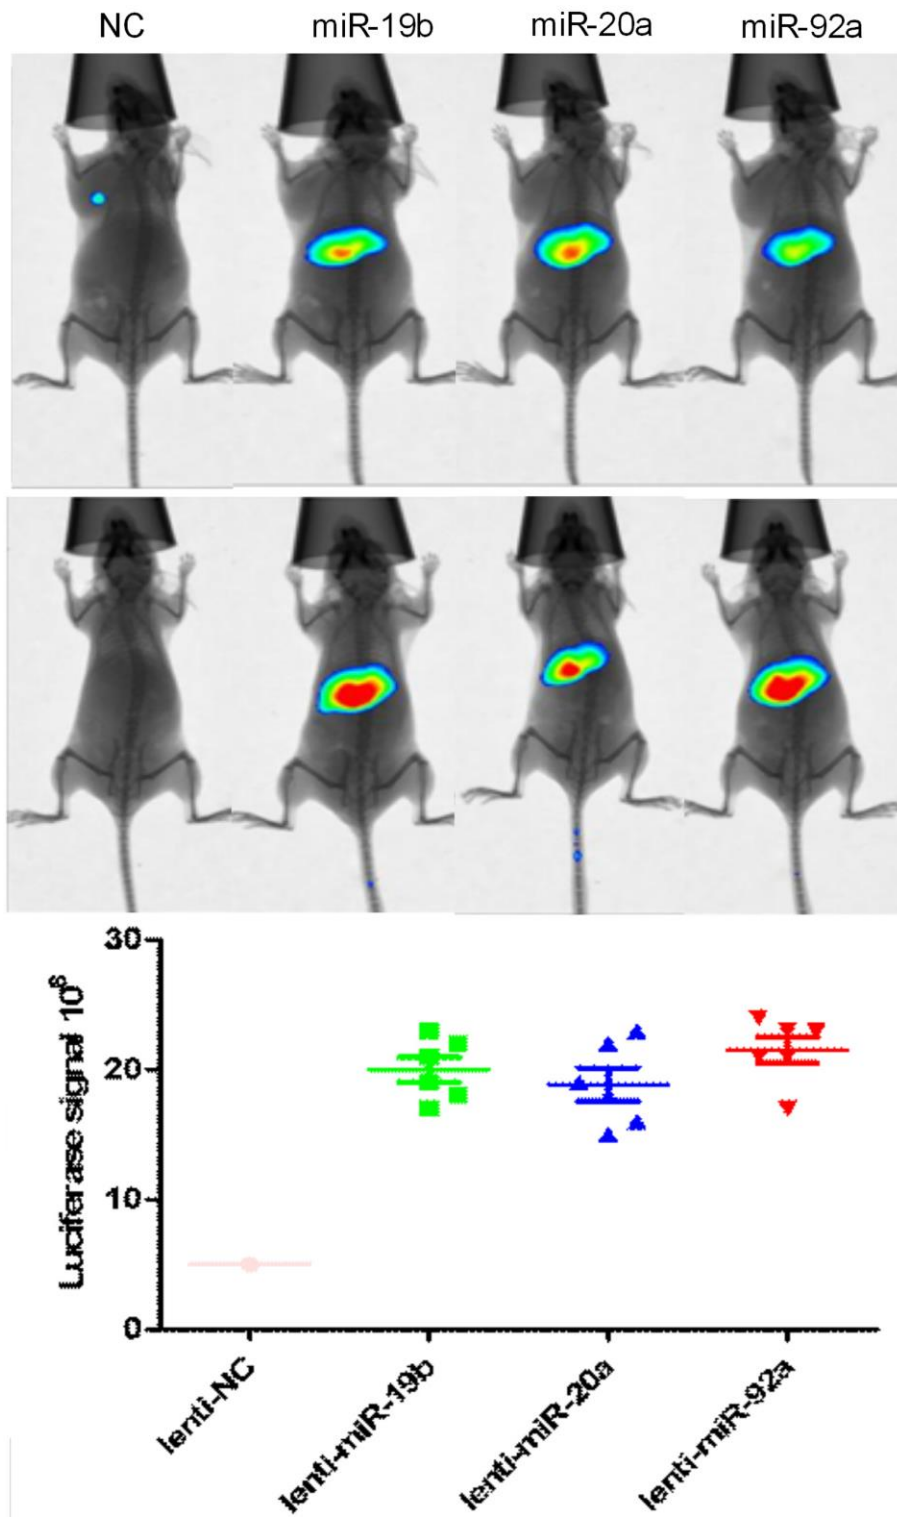

**Figure S2.** Fluorescence signals of tumors in NOD-SCID mice.

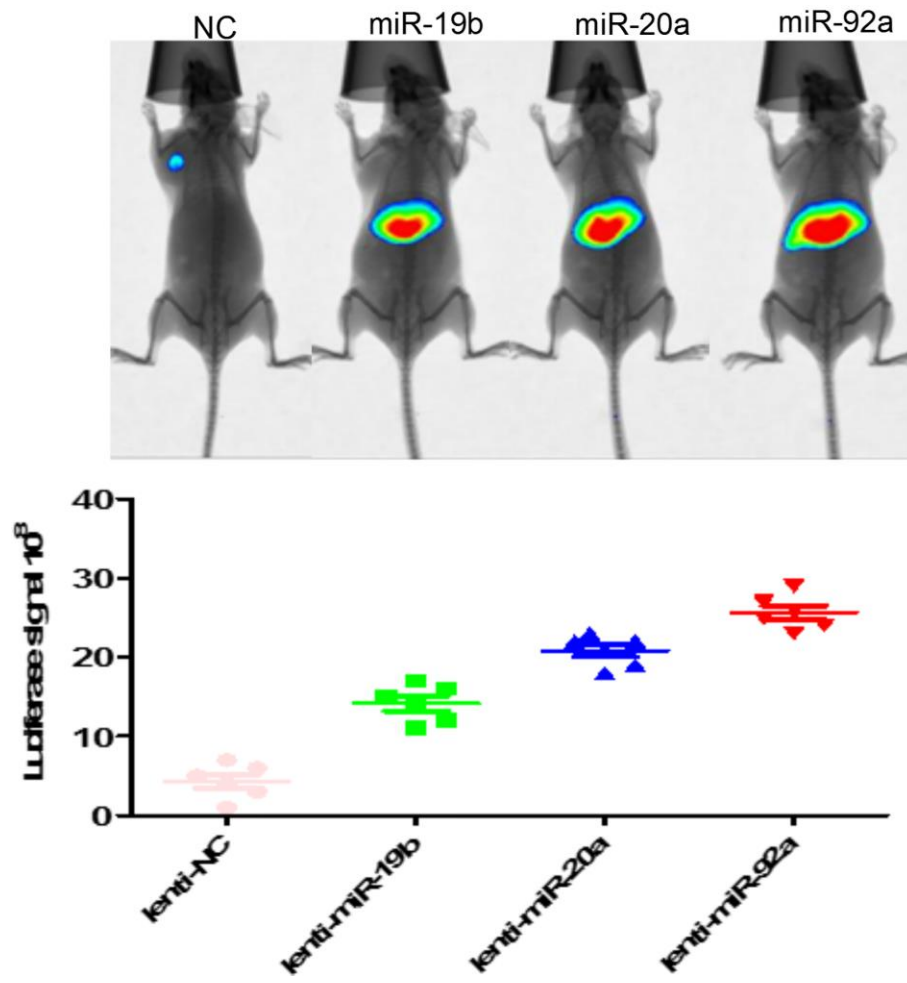

Figure S3. Tumor formation in nude mice.

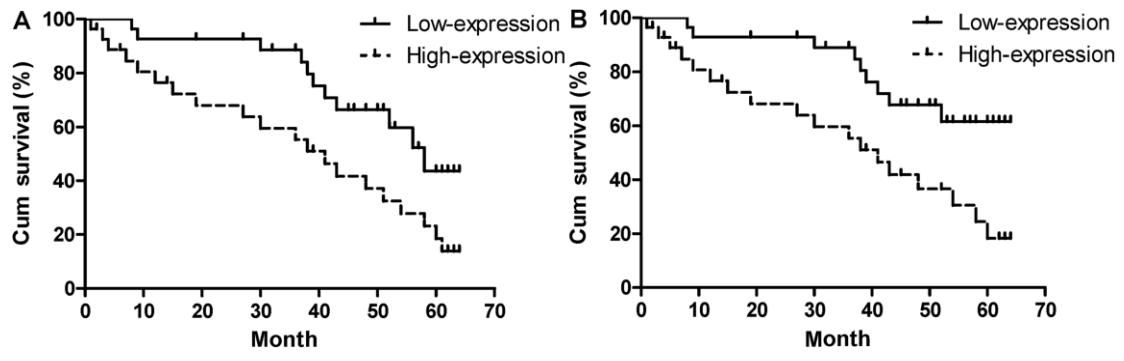

**Figure S4.** Survival analysis results of (A) miRNA-20a and (B) miRNA-92a.
